# Supplementary material for: Optoelectronic performance of perovskite Cs2KMI6 (M = Ga, In) based on high-throughput screening and first-principles calculations
Source: Royal Society of Chemistry journal article supplement (doi:10.1039/d3cp00732d), 2023-01-01
Supplement: d3cp00732d1.pdf [file d3cp00732d1.pdf]

## Supporting information

### **Optoelectronic performance of perovskites Cs<sub>2</sub>KMI<sub>6</sub> (M = Ga, In) based on high-throughput screening and first-principles calculations**

Fangfang Qi<sup>a,b,c</sup>, Xin Lv<sup>a,c</sup>, Jinhui Song<sup>a,c</sup>, Xifeng Fu<sup>a, b, c</sup>, Lingyi Meng<sup>a,b,c,\*</sup>, and Can-Zhong Lu<sup>a,b,c,d,\*</sup>

- a CAS Key Laboratory of Design and Assembly of Functional Nanostructures, and Fujian Provincial Key Laboratory of Nanomaterials, Fujian Institute of Research on the Structure of Matter, Chinese Academy of Sciences, Fuzhou, Fujian 350002, P. R. China
- b College of Chemistry and Materials Science, Fujian Normal University, Fuzhou, Fujian 350007, P. R. China
- c Xiamen Key Laboratory of Rare Earth Photoelectric Functional Materials, Xiamen Institute of Rare Earth Materials, Haixi Institutes, Chinese Academy of Sciences, Xiamen 361021, P. R. China
- d University of Chinese Academy of Sciences, Beijing 100049, P. R. China

\*Corresponding authors.

E-mail address: lymeng@fjirsm.ac.cn (L. Meng) and czlu@fjirsm.ac.cn (C. Lu)

**Table S1.** Shannon radius of elements in site A, M(I), M(III) and X<sup>1</sup>.

| Site | Ion type        | Radius(Å) | Site            | Ion type         | Radius(Å)      |
|------|-----------------|-----------|-----------------|------------------|----------------|
| A    | Cs <sup>+</sup> | 1.88      | M(III)          | Al <sup>3+</sup> | 0.535          |
|      | K <sup>+</sup>  | 1.64      |                 | As <sup>3+</sup> | 0.58           |
|      | Na <sup>+</sup> | 1.39      |                 | Au <sup>3+</sup> | 0.85           |
|      | Rb <sup>+</sup> | 1.72      |                 | Bi <sup>3+</sup> | 1.03           |
| M(I) | Ag <sup>+</sup> | 1.15      |                 | Ga <sup>3+</sup> | 0.62           |
|      | Au <sup>+</sup> | 1.37      |                 | In <sup>3+</sup> | 0.80           |
|      | Cu <sup>+</sup> | 0.77      |                 | Sb <sup>3+</sup> | 0.76           |
|      | In <sup>+</sup> | 0.80      |                 | Sc <sup>3+</sup> | 0.745          |
|      | K <sup>+</sup>  | 1.38      |                 | Y <sup>3+</sup>  | 0.9            |
|      | Li <sup>+</sup> | 0.76      |                 | X                | F <sup>-</sup> |
|      | Na <sup>+</sup> | 1.02      | Cl <sup>-</sup> |                  | 1.81           |
|      | Rb <sup>+</sup> | 1.52      | Br <sup>-</sup> |                  | 1.96           |
|      | Tl <sup>+</sup> | 1.50      | I <sup>-</sup>  |                  | 2.2            |
|      | Cs <sup>+</sup> | 1.67      |                 |                  |                |

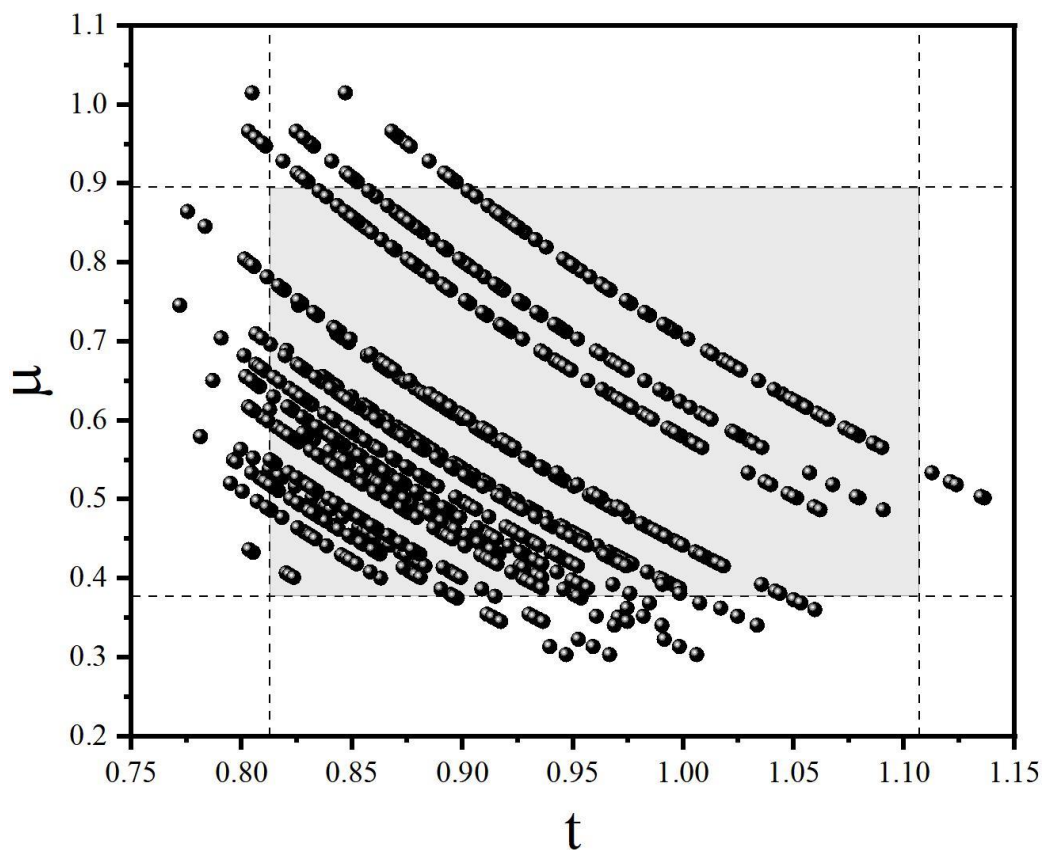

**Figure S1.** The structural factors of  $A_2M(I)M(III)X_6$  compounds.

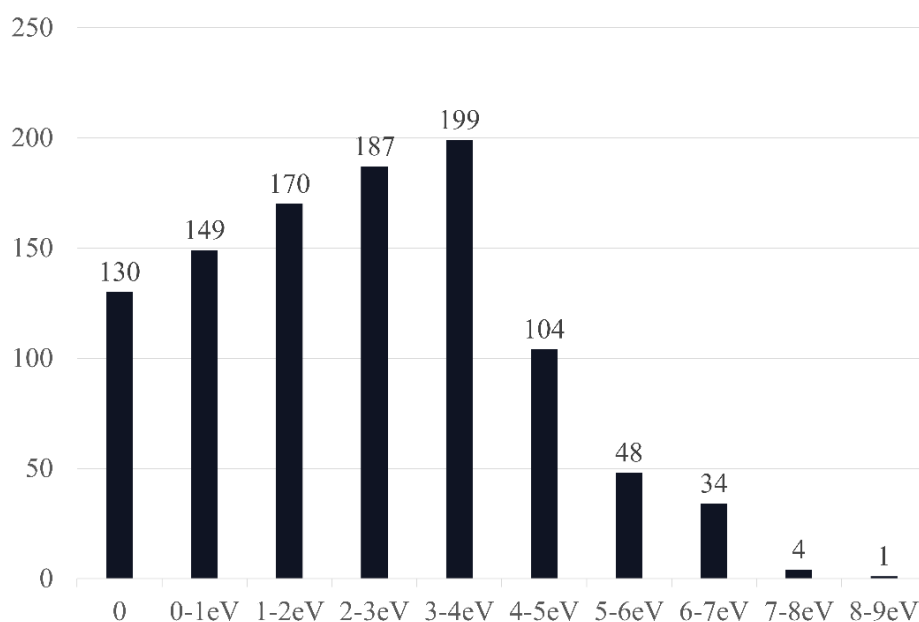

**Figure S2.** Bandgaps distribution of 1026  $A_2M(I)M(III)X_6$  perovskite compounds derived from the Materials Project database<sup>2</sup>.

**Table S2.** Predicted decomposition energies  $\Delta H_D^P$  of 23  $A_2M(I)M(III)X_6$  perovskite compounds<sup>3</sup>.

| Compound       | $\Delta H_D^P$ (eV) | Compound       | $\Delta H_D^P$ (eV) |
|----------------|---------------------|----------------|---------------------|
| $Cs_2AgAlBr_6$ | 0.1058              | $Cs_2TlAsI_6$  | 0.0446              |
| $Cs_2AgGaCl_6$ | 0.1372              | $Cs_2TlSbBr_6$ | 0.0517              |
| $Cs_2AgInCl_6$ | 0.1213              | $K_2AgGaCl_6$  | 0.0866              |
| $Cs_2InBiBr_6$ | 0.0046              | $K_2AgInCl_6$  | 0.0733              |
| $Cs_2InSbCl_6$ | 0.0043              | $K_2AuAlCl_6$  | 0.1207              |
| $Cs_2KGaI_6$   | 0.0307              | $K_2InSbCl_6$  | -0.0435             |
| $Cs_2KInI_6$   | 0.0262              | $Rb_2AgGaCl_6$ | 0.1028              |
| $Cs_2KTlBr_6$  | 0.0553              | $Rb_2AgInCl_6$ | 0.0883              |
| $Cs_2LiTlBr_6$ | 0.0641              | $Rb_2AuAlCl_6$ | 0.1381              |

|                              |        |                              |         |
|------------------------------|--------|------------------------------|---------|
| $\text{Cs}_2\text{NaTlBr}_6$ | 0.0576 | $\text{Rb}_2\text{InSbCl}_6$ | -0.0276 |
| $\text{Cs}_2\text{RbGaI}_6$  | 0.0292 | $\text{Rb}_2\text{TlAsBr}_6$ | 0.0359  |
| $\text{Cs}_2\text{TlAsBr}_6$ | 0.0682 |                              |         |

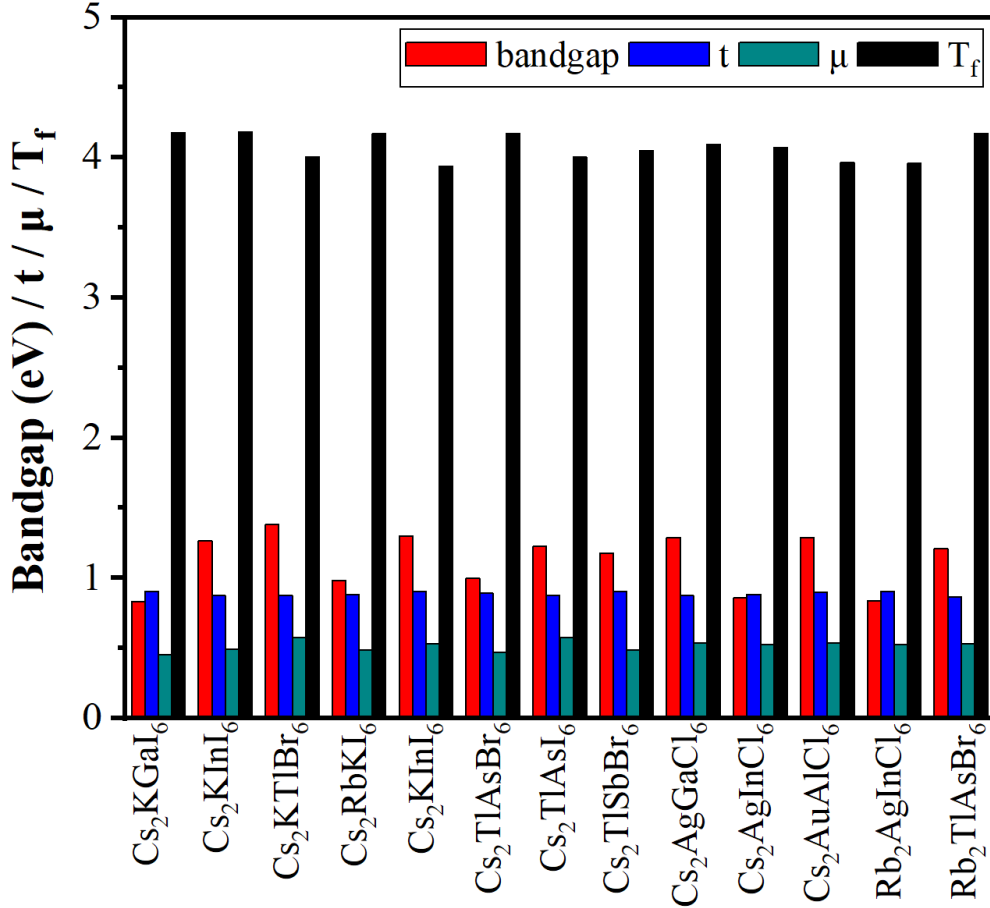

**Figure S3.** Bandgaps and structural factors of 13 selected  $\text{A}_2\text{M(I)M(III)X}_6$  perovskite compounds, based on the Materials Project database<sup>2</sup>.

**Table S3.** The calculated elastic constants  $C_{11}$ ,  $C_{12}$ ,  $C_{44}$ , bulk modulus  $B$ , shear modulus  $G$ , Pugh's ratio ( $B/G$ ), Poisson's ratio  $\nu^4$  of  $\text{Cs}_2\text{KMI}_6$  ( $M = \text{Ga, I}$ ) based on the PBE functional<sup>5</sup>.

|                            | $C_{11}$ (GPa) | $C_{12}$ (GPa) | $C_{44}$ (GPa) | $C_{11} - C_{12}$ | $C_{11} + 2C_{12}$ | $B$ (GPa) | $G$ (GPa) | $B/G$ | $\nu$ |
|----------------------------|----------------|----------------|----------------|-------------------|--------------------|-----------|-----------|-------|-------|
| $\text{Cs}_2\text{KGal}_6$ | 26.39          | 7.85           | 7.13           | 18.54             | 42.09              | 14.03     | 7.99      | 1.76  | 0.261 |
| $\text{Cs}_2\text{KInI}_6$ | 26.88          | 7.18           | 5.27           | 19.7              | 41.24              | 13.75     | 7.11      | 1.93  | 0.280 |

**Table S4.** Calculated formation energies for  $\text{Cs}_a\text{K}_b\text{M}_c\text{I}_d$  ( $M = \text{Ga, In}$ ) based on the PBE functional<sup>5</sup>.

|                                                   |                                       |                                       |                         |                         |                                     |
|---------------------------------------------------|---------------------------------------|---------------------------------------|-------------------------|-------------------------|-------------------------------------|
| <b>Compound</b>                                   | <b>Cs<sub>2</sub>KGaI<sub>6</sub></b> | <b>Cs<sub>2</sub>KInI<sub>6</sub></b> | <b>CsI</b>              | <b>KI</b>               | <b>CsK<sub>2</sub></b>              |
| <b><math>\Delta H_{Cs_aK_bM_cI_d}</math> (eV)</b> | -13.54                                | -13.82                                | -3.13                   | -3.00                   | -3.07                               |
| <b>Compound</b>                                   | <b>GaI<sub>3</sub></b>                | <b>Ga<sub>2</sub>I<sub>3</sub></b>    | <b>CsGa<sub>3</sub></b> | <b>CsGa<sub>7</sub></b> | <b>KGaI<sub>4</sub></b>             |
| <b><math>\Delta H_{Cs_aK_bM_cI_d}</math> (eV)</b> | -2.01                                 | -2.22                                 | -0.67                   | -1.04                   | -5.31                               |
| <b>Compound</b>                                   | <b>InI</b>                            | <b>InI<sub>2</sub></b>                | <b>InI<sub>3</sub></b>  | <b>CsIn<sub>3</sub></b> | <b>Cs<sub>2</sub>In<sub>3</sub></b> |
| <b><math>\Delta H_{Cs_aK_bM_cI_d}</math> (eV)</b> | -0.97                                 | -1.58                                 | -2.03                   | -0.60                   | -0.87                               |

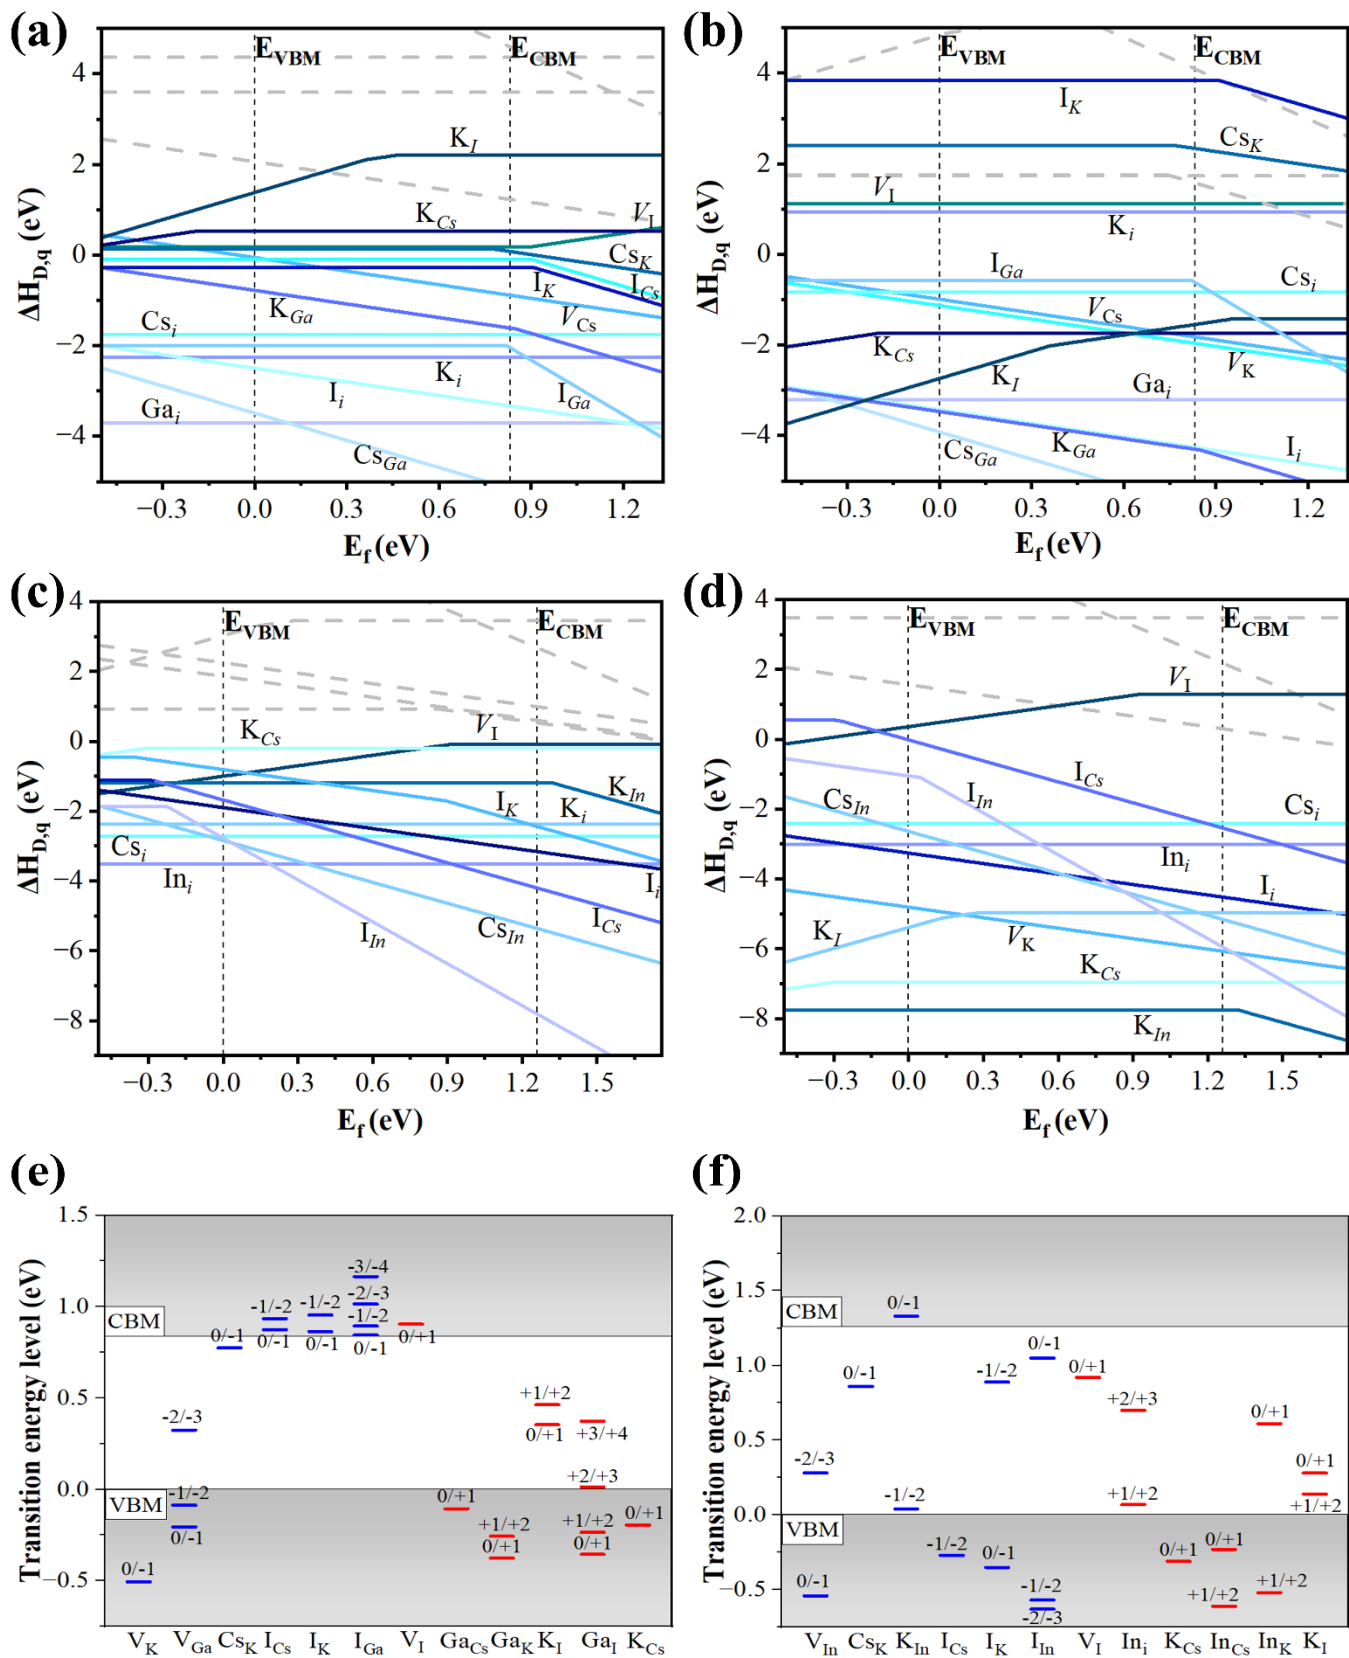

**Figure S4.** Calculated formation enthalpies  $\Delta H_{D,q}$  of intrinsic defects in  $\text{Cs}_2\text{KMI}_6$  ( $M = \text{Ga, In}$ ) as the function of Fermi level  $E_f$ , corresponding the representative chemical potential points in Fig. 2: (a) A (Ga-rich), (b) B (Ga-poor), (c) C (In-rich) and (d) D (In-poor). The solid lines show the trend of formation

enthalpies of the most stable charge states at particular defects change with Fermi level. The grey dashed lines represent the defects with high  $\Delta H_{D,q}$ . The slope of the line segment corresponds the charge state  $q$ , while the turning points correspond the charge-state transition energy levels. The Fermi level is aligned to the VBM of pristine crystals<sup>6</sup>. Charge-state transition levels of the major intrinsic defects: (e)  $\text{Cs}_2\text{KGaI}_6$  (f)  $\text{Cs}_2\text{KInI}_6$ .

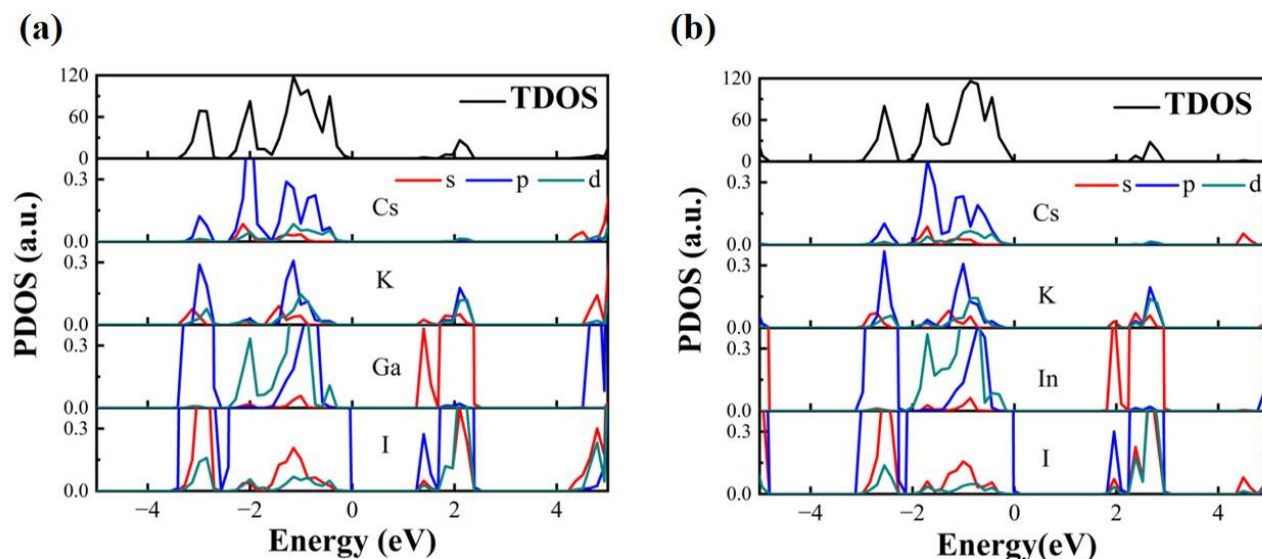

**Figure S5.** Total and projected density of states (TDOSs and PDOSs) of (a)  $\text{Cs}_2\text{KGaI}_6$  and (b)  $\text{Cs}_2\text{KInI}_6$ . The calculations are based on the HSE06 functional<sup>7, 8</sup>.

## REFERENCES

- 1 R. D. Shannon, *Acta Cryst. A*, 1976, **32**, 751-767.
- 2 Materials Project database, <https://materialsproject.org/>.
- 3 Q. Sun and W. J. Yin, *J. Am. Chem. Soc.*, 2017, **139**, 14905-14908.
- 4 M. Born, K. Huang and M. Lax, *Am. J. Phys.*, 1955, **23**, 474-474.
- 5 J. P. Perdew, K. Burke and M. Ernzerhof, *Phys. Rev. Lett.*, 1996, **77**, 3865-3868.
- 6 J. Xu, J. B. Liu, B. X. Liu and B. Huang, *J. Phys. Chem. Lett.*, 2017, **8**, 4391-4396.
- 7 J. Heyd, G. E. Scuseria and M. Ernzerhof, *J. Chem. Phys.*, 2004, **118**, 8207-8215.
- 8 J. Paier, M. Marsman, K. Hummer, G. Kresse, I. C. Gerber and J. G. Angyan, *J. Chem. Phys.*, 2006, **124**, 154709.
